# Supplementary material for: p53-dependent expression of CXCR5 chemokine receptor in MCF-7 breast cancer cells
Source: PubMed Central journal article supplement (PMC4365401; doi:10.1038/srep09330), 2015-03-19
Supplement: srep09330-s1.pdf [file srep09330-s1.pdf]

## Supplementary Material for:

### **p53-dependent expression of CXCR5 chemokine receptor in MCF-7 breast cancer cells**

Nikita A Mitkin<sup>1</sup>, Christina D Hook<sup>1</sup>, Anton M Schwartz<sup>1</sup>, Subir Biswas<sup>2</sup>, Dmitry V Kochetkov<sup>3</sup>, Alisa M Muratova<sup>1,4</sup>, Marina A Afanasyeva<sup>1</sup>, Julia E Kravchenko<sup>3</sup>, Arindam Bhattacharyya<sup>2</sup>, Dmitry V Kuprash<sup>1,4\*</sup>

<sup>1</sup> Laboratory of Intracellular Signaling in Health and Disease, Engelhardt Institute of Molecular Biology Russian Academy of Sciences, Vavilov str. 32, 119991 Moscow, Russia

<sup>2</sup> Department of Zoology, University of Calcutta, Ballygunge Circular Road 35, 700019 Calcutta, India

<sup>3</sup> Group of Regulation of Genome Transcription, Engelhardt Institute of Molecular Biology Russian Academy of Sciences, Vavilov str. 32, 119991 Moscow, Russia

<sup>4</sup> Department of Immunology, Lomonosov Moscow State University, Leninskye gory 1, 119234 Moscow, Russia

\* Corresponding author. Laboratory of Intracellular Signaling in Health and Disease, Engelhardt Institute of Molecular Biology Russian Academy of Sciences, Vavilov str. 32, 119991 Moscow, Russia. Phone: +7-499-135-9770; E-mail: kuprash@eimb.ru

| Table of Contents:     | page |
|------------------------|------|
| Supplementary Table 1  | 2    |
| Supplementary Figure 1 | 4    |
| Supplementary Figure 2 | 4    |
| Supplementary figure 3 | 5    |
| Supplementary figure 4 | 6    |

**Table 1: sequences of oligonucleotides used in the work**

| Primers for Real-time PCR |                          |
|---------------------------|--------------------------|
| β-actin fw                | 5'-TCCGTGACATTAAGGAGAAG  |
| β-actin rev               | 5'-GTCAGGCAGCTCGTAGCTCT  |
| CXCR5 fw                  | 5'-GCTAACGCTGGAAATGGA    |
| CXCR5 rev                 | 5'-GCAGGGCAGAGATGATTT    |
| p53 fw                    | 5'-ACTTTGCGTTCGGGCTGGGA  |
| p53 rev                   | 5'-GTCTGGCTGCCAATCCAGGGA |
| NFATc3 fw                 | 5'- CCAAAGCCTGGCCACACCCC |
| NFATc3 rev                | 5'-TGCCCCTCGGCTACCTTCAGT |
| c-Jun fw                  | 5'-TGGCAGAGTCCCGGAGCCAA  |
| c-Jun rev                 | 5'-CTCGCGCTCGCCAAGTTCA   |

| Primers for amplification of CXCL13 and IL7 genes from human genome |                                     |
|---------------------------------------------------------------------|-------------------------------------|
| CXCL13 fw                                                           | TTTGGTACCATGAAGTTCATCTCGACATCT      |
| CXCL13 rev                                                          | AAATCTAGATCAGGGAATCTTTCTTTAAACACT   |
| IL7 fw                                                              | TTTGGTACCATGTTCCATGTTTCTTTTAGATATAT |
| IL7 rev                                                             | AAATCTAGATTATATACTGCCCTTCAAATTTTATT |

| Primers for amplification of CXCR5 promoter, enhancer and control sequence from human genome |                                |
|----------------------------------------------------------------------------------------------|--------------------------------|
| Prom fw                                                                                      | GGTAAGCTTCTCGGCCTTCCAAAGTTGATT |
| Prom rev                                                                                     | TAACCATGGAGAATTCAGACAGGGCCTC   |
| Enh fw                                                                                       | TATGGATCCAGAGCCTCCTTCCAACAGAA  |
| Enh rev                                                                                      | TATGTCGACTACAAGCTGGAACCATGGGT  |
| Contr fw                                                                                     | ACTGGATCCCATCTGGTTAGAAAGTGCA   |
| Contr rev                                                                                    | TGAGTCGACCTATAAATGATGAACCCAGG  |

| Primers for deletion scanning of CXCR5 promoter |                               |
|-------------------------------------------------|-------------------------------|
| del1 fw                                         | GGTAAGCTTGTTTTGCCTCTGTTGGGCAA |
| del2 fw                                         | GGTGGATCCGACTGGAATGGTTGATCACC |
| del2 rev                                        | GTTGGATCCCCCTTCCCTTCTCAGCTCA  |
| del3 fw                                         | GGTGGATCCATCAACCTGCTGACTTTGCG |
| del3 rev                                        | GGTGGATCCCTGCCAAGGACTGAAAAGTC |

|          |                               |
|----------|-------------------------------|
| del4 fw  | GGTGGATCCTTATTGCCGGGAAAGAAGCT |
| del4 rev | GGTGGATCCTGAGGGAAACTCCTGATCAA |
| del5 fw  | TAAGGATCCCAGGTCGCGGCCCTACTGCC |
| del5 rev | GGTGGATCCATTGTCTCAACTGGGGCCTA |
| del6 fw  | GGTGGATCCTCAACATAAGACAGTGACCA |
| del6 rev | GGTGGATCCGCCTCACAACCTCATCACTT |
| del7 fw  | GGTGGATCCTGAGTAGACACGGGTAGCTT |
| del7 rev | GGTGGATCCAGAGGCTCCCCGCCAGGTGC |
| del8 rev | TAACCATGGACCAGGTCCTCCAGGTTCTC |

|                                                     |                               |
|-----------------------------------------------------|-------------------------------|
| Primers for site-directed mutagenesis of NFkB sites |                               |
| mut1 fw                                             | GACTTAGCGTTTCTGCACTCAAGGGACT  |
| mut1 rev                                            | TTGACTGCAGAAACCGCTAAGTCCTGGCA |
| mut2 fw                                             | TGATCAGCAGTTGAGCTCATCAACCTGCT |
| mut2 rev                                            | GAGCTCAACTGCTGATCAACAGAGAACAG |
| mut3 fw                                             | CTGTGGGCGATTTGAGCTCTTTCTTCAAA |
| mut3 rev                                            | AGAAAAGAGCTCAAATCGCCACAGCATCA |

|                        |                        |
|------------------------|------------------------|
| Primers for CHIP assay |                        |
| NFkB1 fw               | ACCTATCTTTTCTGAACTTGAG |
| NFkB1 rev              | GCCACCTCCAAACCTTCATT   |
| NFkB2 fw               | GGTTTGGAGGTGGCTTGAG    |
| NFkB2 rev              | GTCTCAACTGGGGCCTATGA   |
| NFkB3 fw               | ACTAGTCATAGGCCCCAGTTG  |
| NFkB3 rev              | CGTCTCCTGAGGCAGTAGGG   |
| Control fw             | GCCACTGTCACACAGCTACT   |
| Control rev            | GTGTTTGACAGACTGGCTGAA  |

|                                                                                                          |                                     |
|----------------------------------------------------------------------------------------------------------|-------------------------------------|
| Primers for minimal CMV promoter amplification and oligonucleotides for NFkB response element assembling |                                     |
| minCMV fw                                                                                                | TGGAAGCTTTAGGCGTGTACGGTGGGAG        |
| minCMV rev                                                                                               | GAGCCATGGCGGATCTGACGGTTCATAA        |
| NFkB resp fw                                                                                             | GAGCTCGGGAACCTCCGGAATTTCCGGGGAAGTCC |
| NFkB resp rev                                                                                            | CCCGGGGGGAAGTCCCGGAATTTCCGGACTTCCCC |

**Figure S1: Full-size images of western blots of CXCR5 (A),  $\beta$ -actin (B) and of p53 (C)**

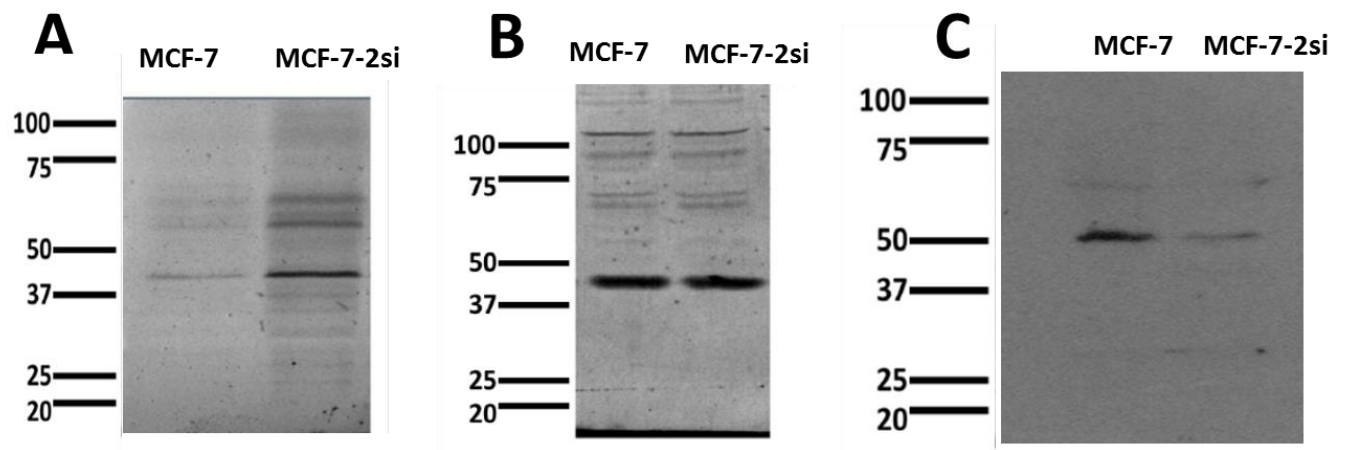

(A) and (B) are images of the same membrane stained with anti-CXCR5 and anti- $\beta$ -actin, respectively.

**Figure S2: Relative expressions of CXCR5 and p53 in breast cancer cell lines with wild type and mutant p53**

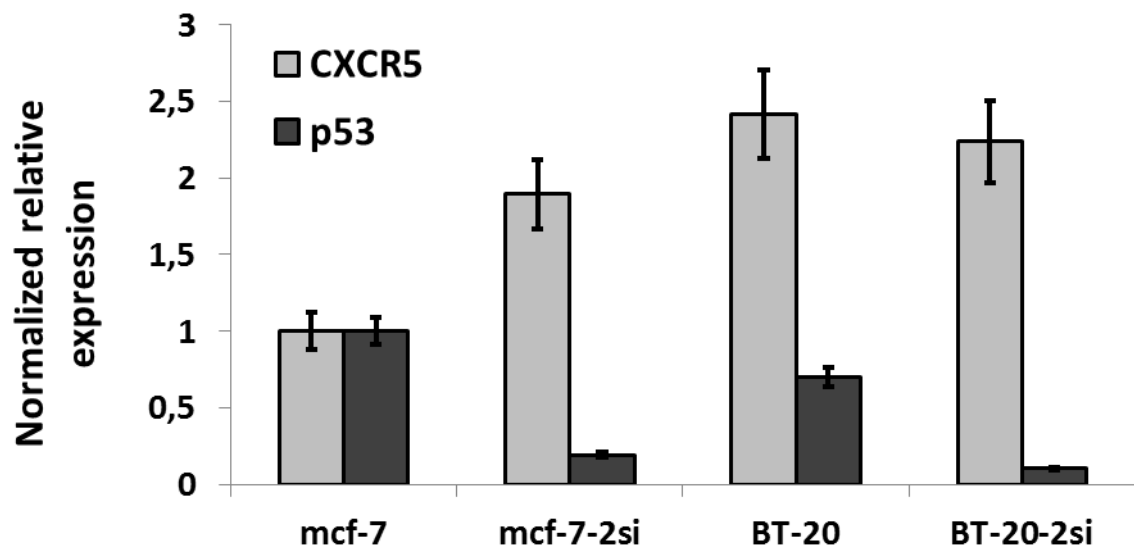

In BT-20 breast cancer cell line p53 is mutated and not functional as a DNA-binding protein. Basal expression of p53 in BT-20 cells is lower than in MCF-7. CXCR5 expression level in BT-20 is higher than in MCF-7-2si. High expression of CXCR5 in BT-20 correlates with p53 nonfunctional status. Suppression of mutant p53 in BT-20 cells (BT-20-2si) had no effect on CXCR5 expression.

Figure S3: Promoter and enhancer elements in *cxcr5* gene.

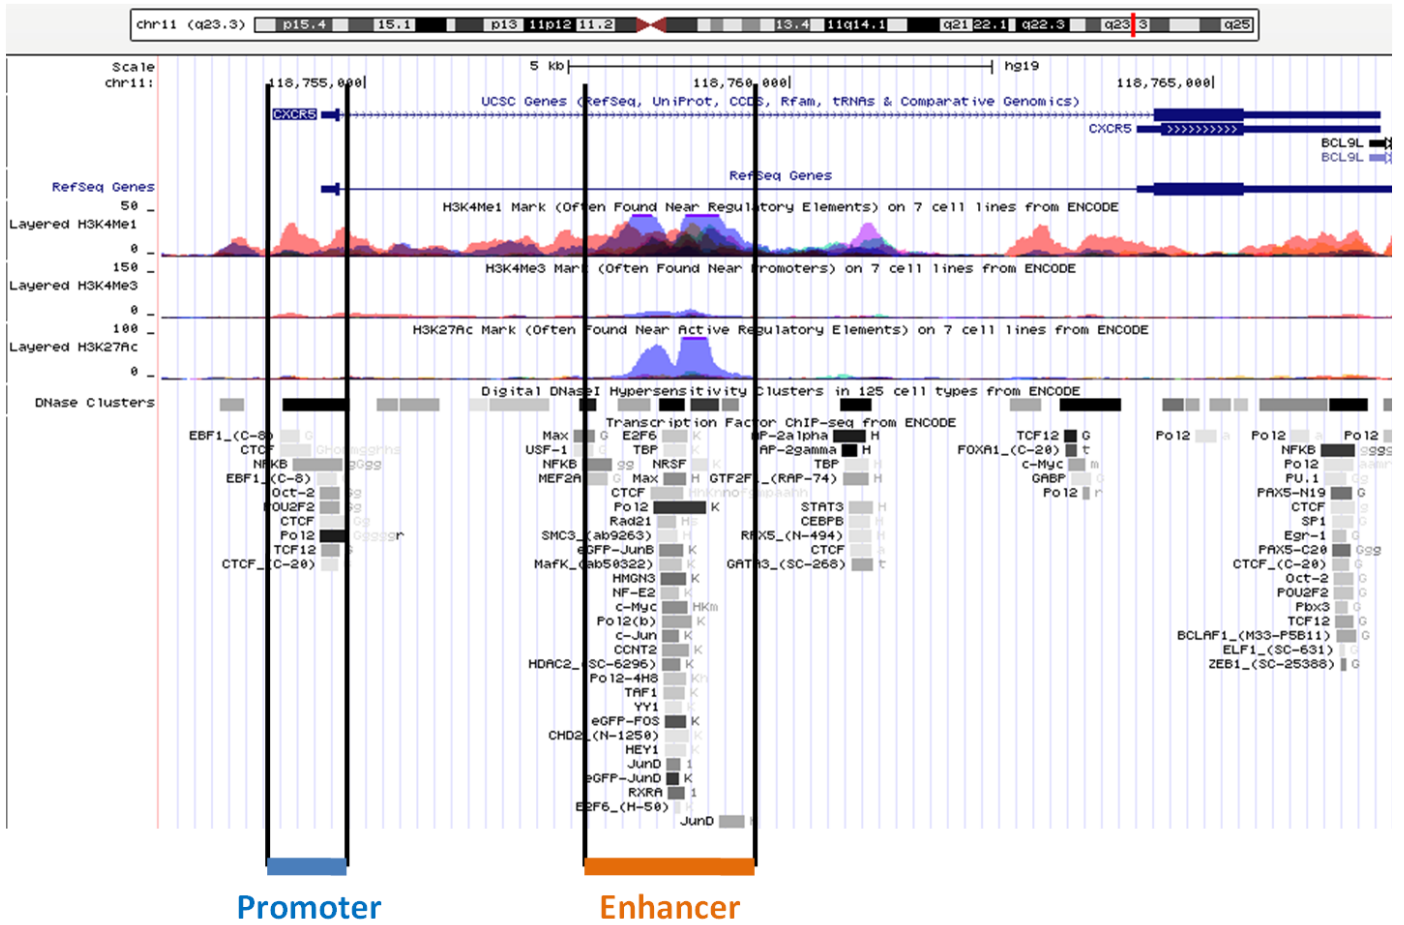

Scheme of *cxcr5* gene (as displayed in UCSC Genome Browser) with maps of histone modifications and DNase I hypersensitivity clusters

**Figure S4: Relative expressions of CXCR5 and p53 (A) and cxcr5 promoter activity (B) in original and lentivirus-transduced MCF-7 cells**

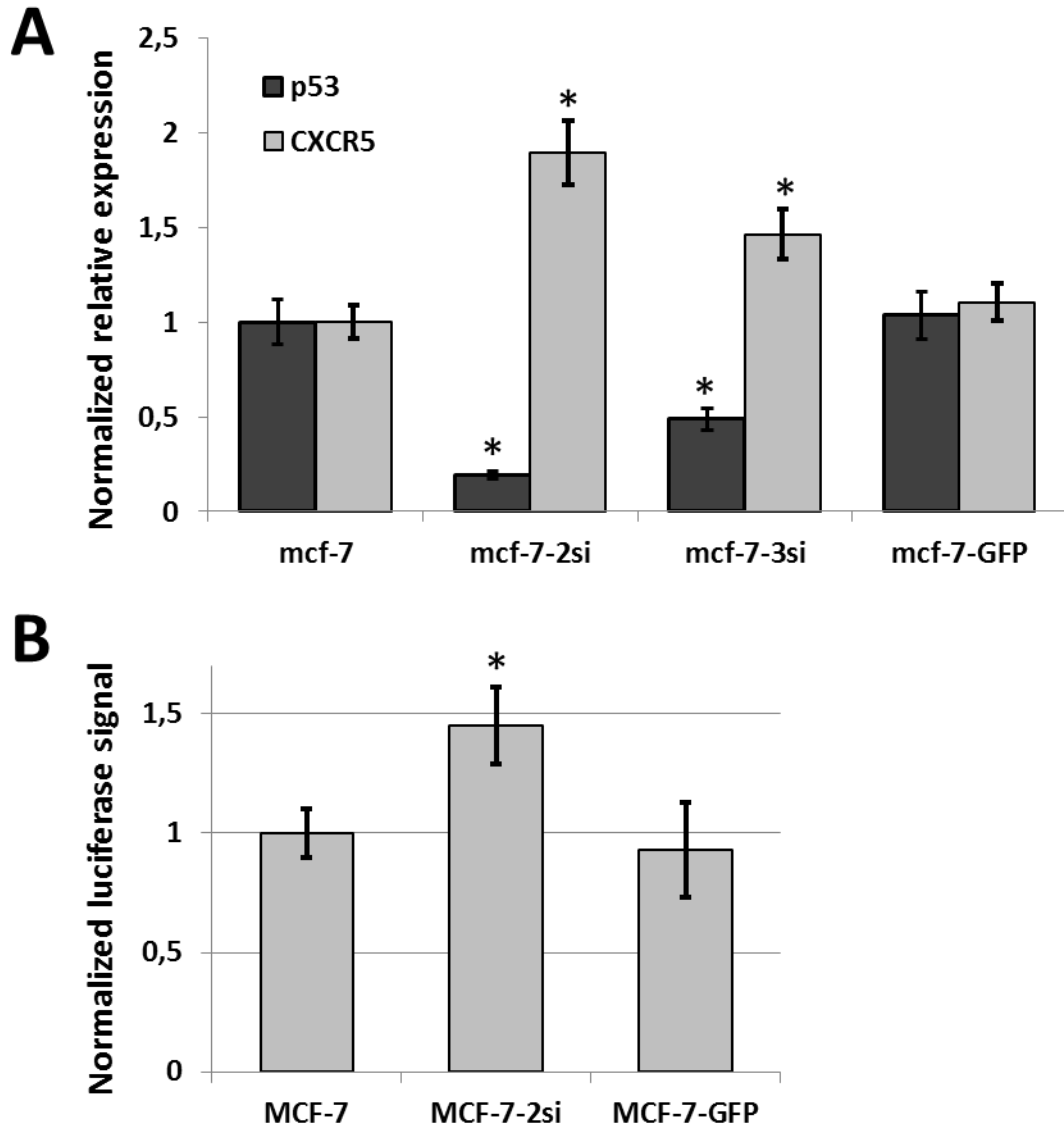

Cells transduced with two variants of p53 shRNA were named as MCF-7-2si and MCF-7-3si. The degree of shRNA-mediated p53 suppression correlates with CXCR5 expression level. Control MCF-7 cells were transduced with lentiviral vector containing GFP-expressing cassette which had no significant effect on p53 and CXCR5 expression levels (A) or on cxcr5 promoter activity (B).
